# Supplementary material for: Insight into the Storage Mechanism of Sandwich-Like Molybdenum Disulphide/Carbon Nanofibers Composite in Aluminum-Ion Batteries
Source: MDPI journal article supplement (doi:10.3390/nano14050442), 2024-02-28
Supplement: s1 [file s1]

# **Insight into the Storage Mechanism of Sandwich-Like Molybdenum Disulphide/Carbon Nanofibers Composite in Aluminum-Ion Batteries**

**Xiaobing Wang <sup>1</sup>, Ruiyuan Zhuang <sup>2,\*</sup>, Xinyi Liu <sup>1</sup>, Mingxuan Hu <sup>1</sup>, Panfeng Shen <sup>1</sup>, Jintao Luo <sup>1</sup>, Jianhong Yang <sup>3</sup> and Jianchun Wu <sup>3,4,\*</sup>**

<sup>1</sup> School of Advanced Materials Engineering, Jiaxing Nanhu University, Jiaxing 314000, China; 202145575121@jxnhu.edu.cn (X.W.); 202145675122@jxnhu.edu.cn (X.L.); 202145895115@jxnhu.edu.cn (M.H.); 202145905121@jxnhu.edu.cn (P.S.); 202145905123@jxnhu.edu.cn (J.L.)

<sup>2</sup> School of Mechanical and Electrical Engineering, Jiaxing Nanhu University, Jiaxing 314000, China

<sup>3</sup> School of Materials Science and Engineering, Jiangsu University, Zhenjiang 212013, China; jhyang@ujs.edu.cn

<sup>4</sup> Institute of Nuclear Science and Technology, Sichuan University, Chengdu 610064, China

\* Correspondence: zhuangryuan@jxnhu.edu.cn (R.Z.); jcwu@ujs.edu.cn (J.W.)

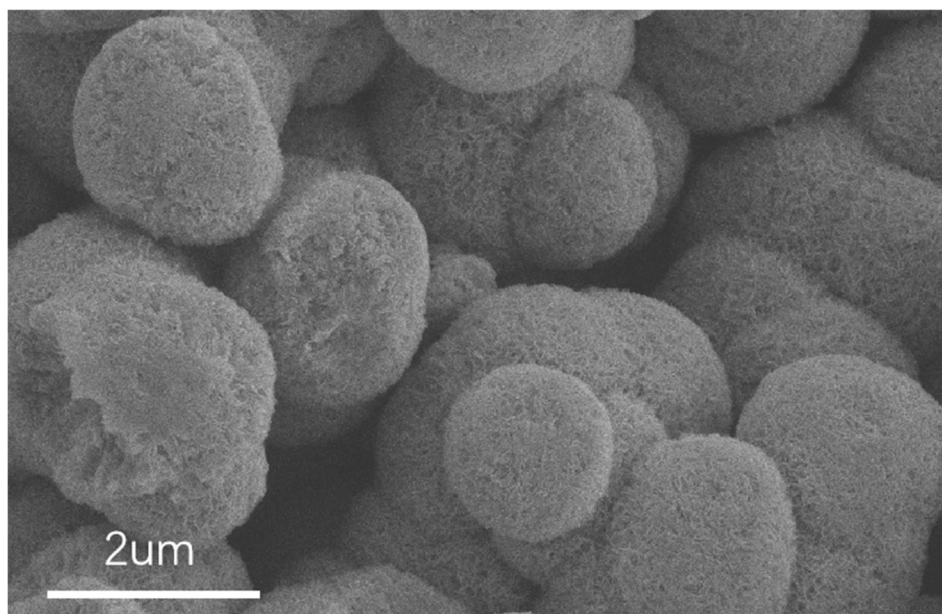

**Figure S1** Scanning electron microscopy (SEM) images of MoS<sub>2</sub>.

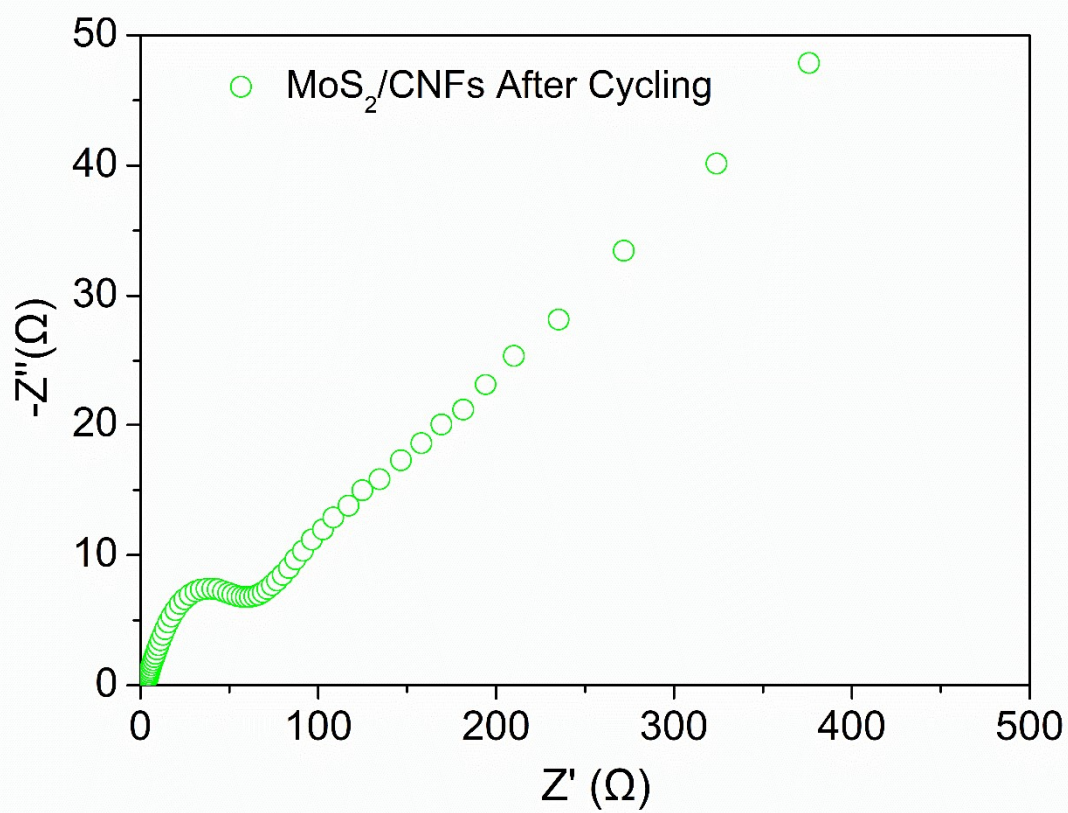

**Figure S2** Nyquist plots of MoS<sub>2</sub>/CNFs after cycling.

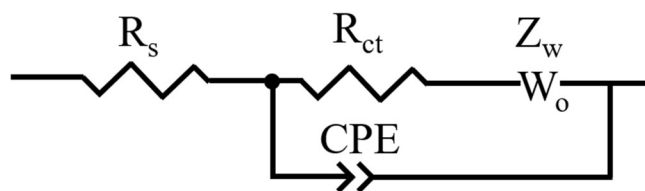

**Figure S3** Equivalent circuit model.

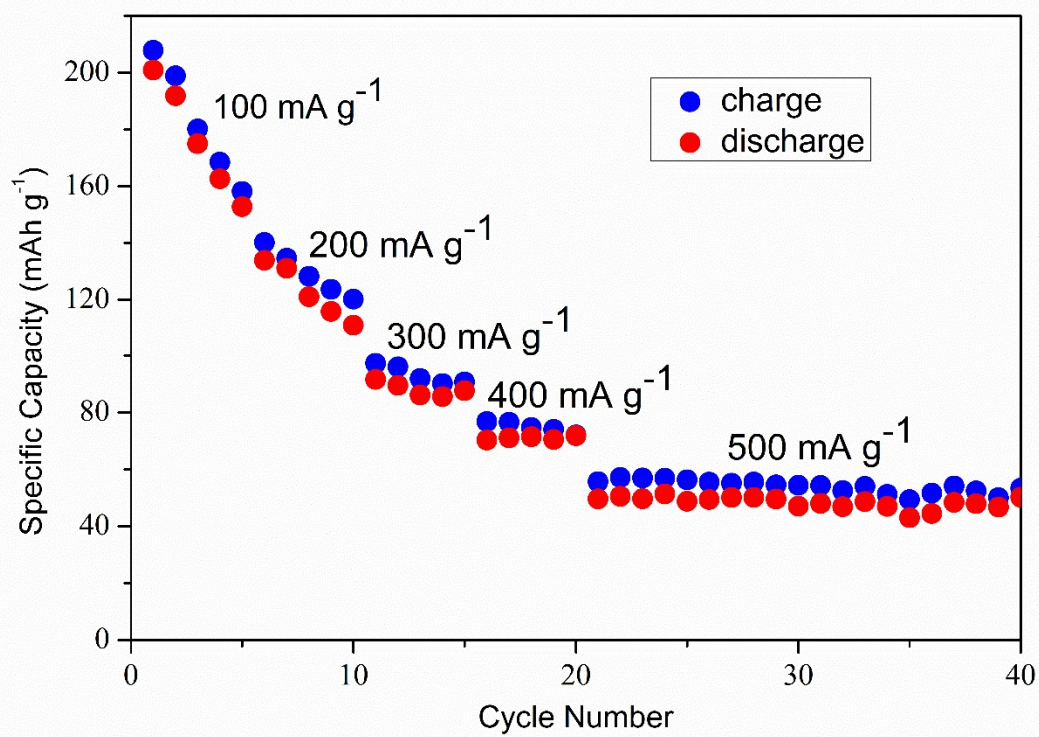

**Figure S4** Rate performance of  $\text{MoS}_2/\text{CNFs}$  electrode at different current density.

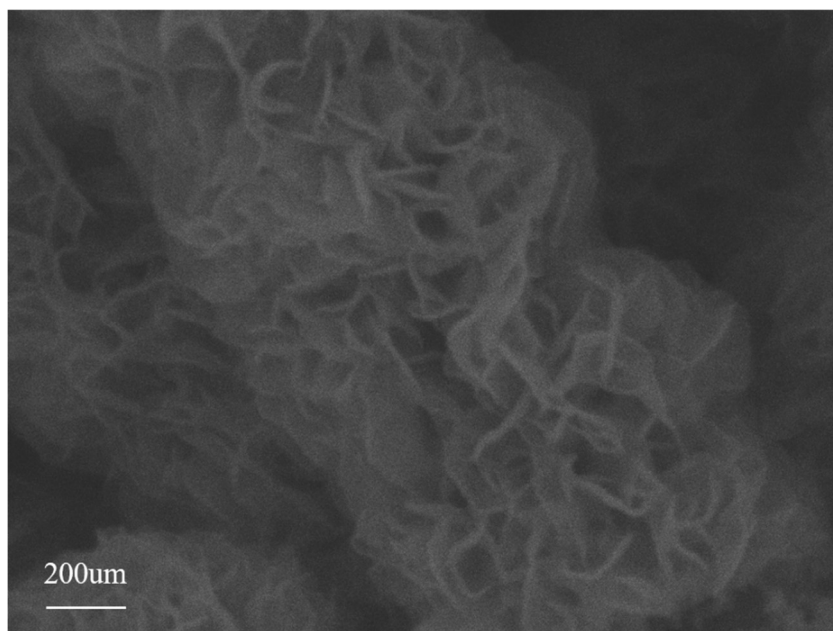

**Figure S5** Scanning electron microscopy (SEM) images of MoS<sub>2</sub>/CNFs after cycling.

**Table S1** Performance comparison of MoS<sub>2</sub>/CNFs with several other transition metal dichalcogenides for application in AIBs

| Cathode materials                          | Cycle number | Current density (mA g <sup>-1</sup> ) | Specific capacity (mAh g <sup>-1</sup> ) | Ref.             |
|--------------------------------------------|--------------|---------------------------------------|------------------------------------------|------------------|
| Graphene-VS <sub>2</sub>                   | 50           | 100                                   | 50                                       | [39]             |
| VS <sub>4</sub>                            | 120          | 400                                   | 129.24                                   | [40]             |
| Ni <sub>3</sub> S <sub>2</sub> @graphene   | 100          | 100                                   | 60                                       | [41]             |
| Mo <sub>6</sub> S <sub>8</sub>             | 50           | 12                                    | 70                                       | [42]             |
| Co <sub>3</sub> S <sub>4</sub> microsphere | 150          | 50                                    | 90                                       | [43]             |
| SnS porous film                            | 100          | 200                                   | 70                                       | [44]             |
| Layered TiS <sub>2</sub>                   | 50           | 5                                     | 85                                       | [45]             |
| VS <sub>4</sub> @rGO                       | 100          | 300                                   | 80                                       | [46]             |
| WS <sub>2</sub> @NCNFs                     | 100          | 100                                   | 198                                      | [47]             |
| 2D WS <sub>2</sub>                         | 500          | 1000                                  | 119                                      | [48]             |
| Graphene-SnS <sub>2</sub>                  | 100          | 200                                   | 70                                       | [49]             |
| MoS <sub>2</sub>                           | 100          | 40                                    | 66.7                                     | [27]             |
| CoS <sub>2</sub> /CNT                      | 100          | 100                                   | 60                                       | [50]             |
| <b>MoS<sub>2</sub>/CNFs</b>                | <b>200</b>   | <b>100</b>                            | <b>66</b>                                | <b>This work</b> |

**Table S2** The formation energy of aluminum ions embedded in different channels of MoS<sub>2</sub>

| the possible entry pathways<br>for aluminum ions | Total energy<br>(eV) | Formation energy<br>(eV) |
|--------------------------------------------------|----------------------|--------------------------|
| Channel 1                                        | -716.86              | 5.34                     |
| Channel 2                                        | -720.62              | 0.64                     |
